# Supplementary material for: Convolutional neural network-based automatic heart segmentation and quantitation in 123I-metaiodobenzylguanidine SPECT imaging
Source: EJNMMI Res. 2021 Oct 12;11:105. doi: 10.1186/s13550-021-00847-x (PMC8511236; doi:10.1186/s13550-021-00847-x)
Supplement: Supplementary file 1 — Additional file 1. Relationship of heart counts in patients with reduced uptake between CNN and conventional methods. [file 13550_2021_847_MOESM1_ESM.pdf]

# Convolutional neural network-based automatic heart segmentation and quantitation in $^{123}\text{I}$ - metaiodobenzylguanidine SPECT imaging

Saito S, Nakajima K, Edenbrandt L, Enqvist O, Ulén J, Kinuya S.

## Relationship of heart counts in patients with reduced uptake between CNN and conventional methods

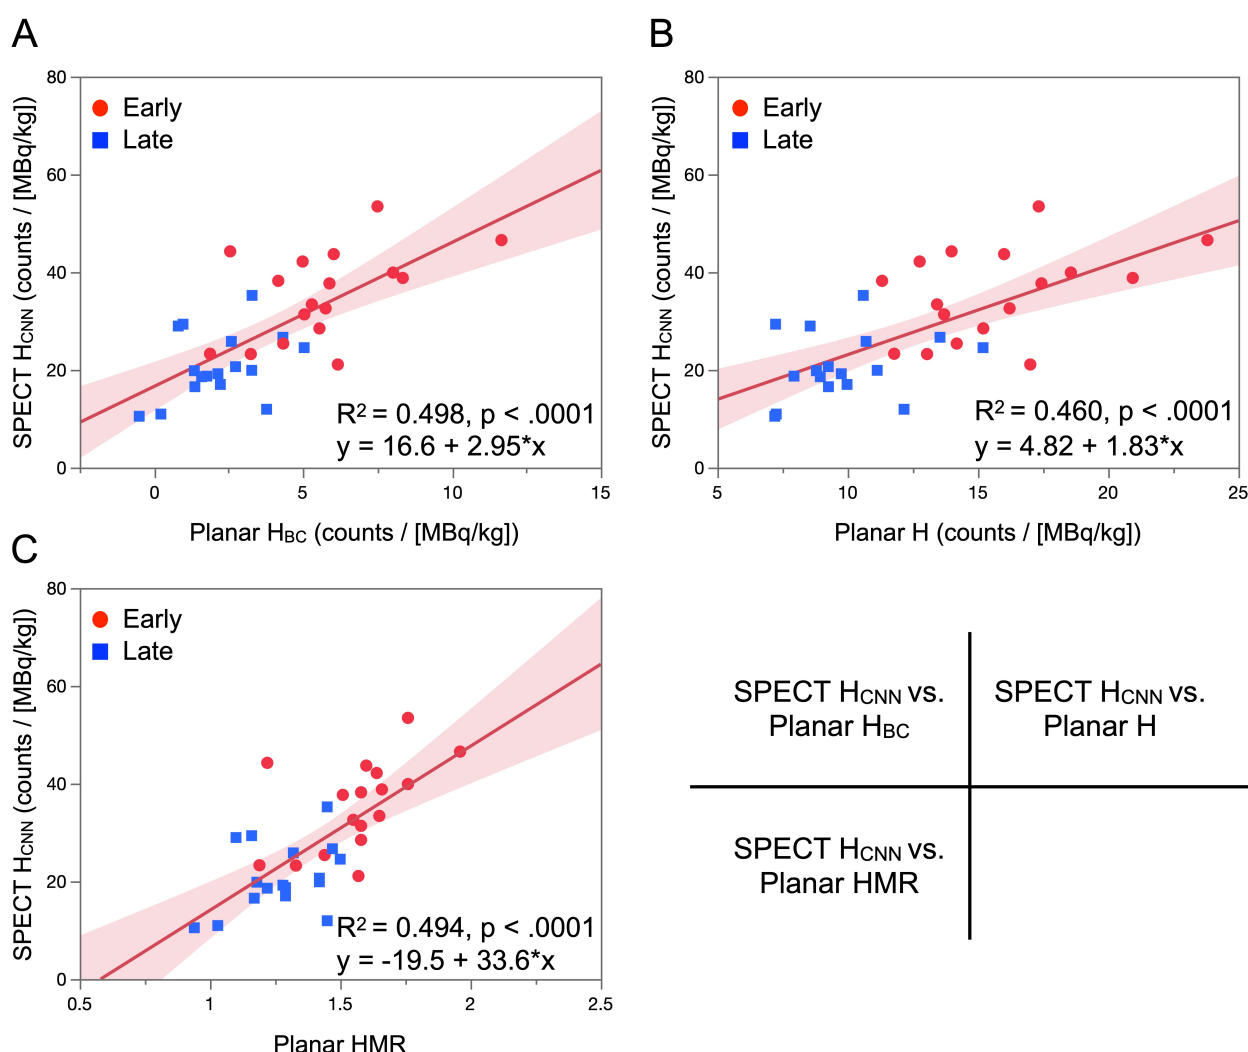

**Figure S1.** Relationships between average heart counts calculated from SPECT images using CNN and from conventional planar images in patients with reduced myocardial  $^{123}\text{I}$ -MIBG uptake. SPECT  $H_{\text{CNN}}$  vs. Planar  $H_{\text{BC}}$  (A), Planar H (B), and Planar HMR (C). Red circles and blue squares, early and late images, respectively. Shaded area, confidence of fit.
